# Supplementary material
Source: PubMed Central journal article supplement (PMC5846152)
Supplement: supp_RA117.001207_134285_1_supp_52907_p2xx5y.pdf [file supp_RA117.001207_134285_1_supp_52907_p2xx5y.pdf]

Supplement to:  
Restricted processing of CD16a N-glycans from primary human NK cells impacts structure and  
function

**Kashyap R. Patel<sup>++</sup>, Jacob T. Roberts<sup>++</sup>, Ganesh P. Subedi<sup>++</sup> and Adam W. Barb**  
<sup>++</sup> denotes equal contribution

From the Roy J. Carver Department of Biochemistry, Biophysics and Molecular Biology,  
Molecular Biology Building, Ames, IA 50011

Running Title: *N-glycans from NK cell CD16a*

To Whom Correspondence Should be Addressed: Adam W. Barb, Roy J. Carver Department of  
Biochemistry, Biophysics and Molecular Biology, 2437 Pammel Drive, Molecular Biology  
Building, rm 4210, Iowa State University, Ames, IA 50011; Email: [abarb@iastate.edu](mailto:abarb@iastate.edu)

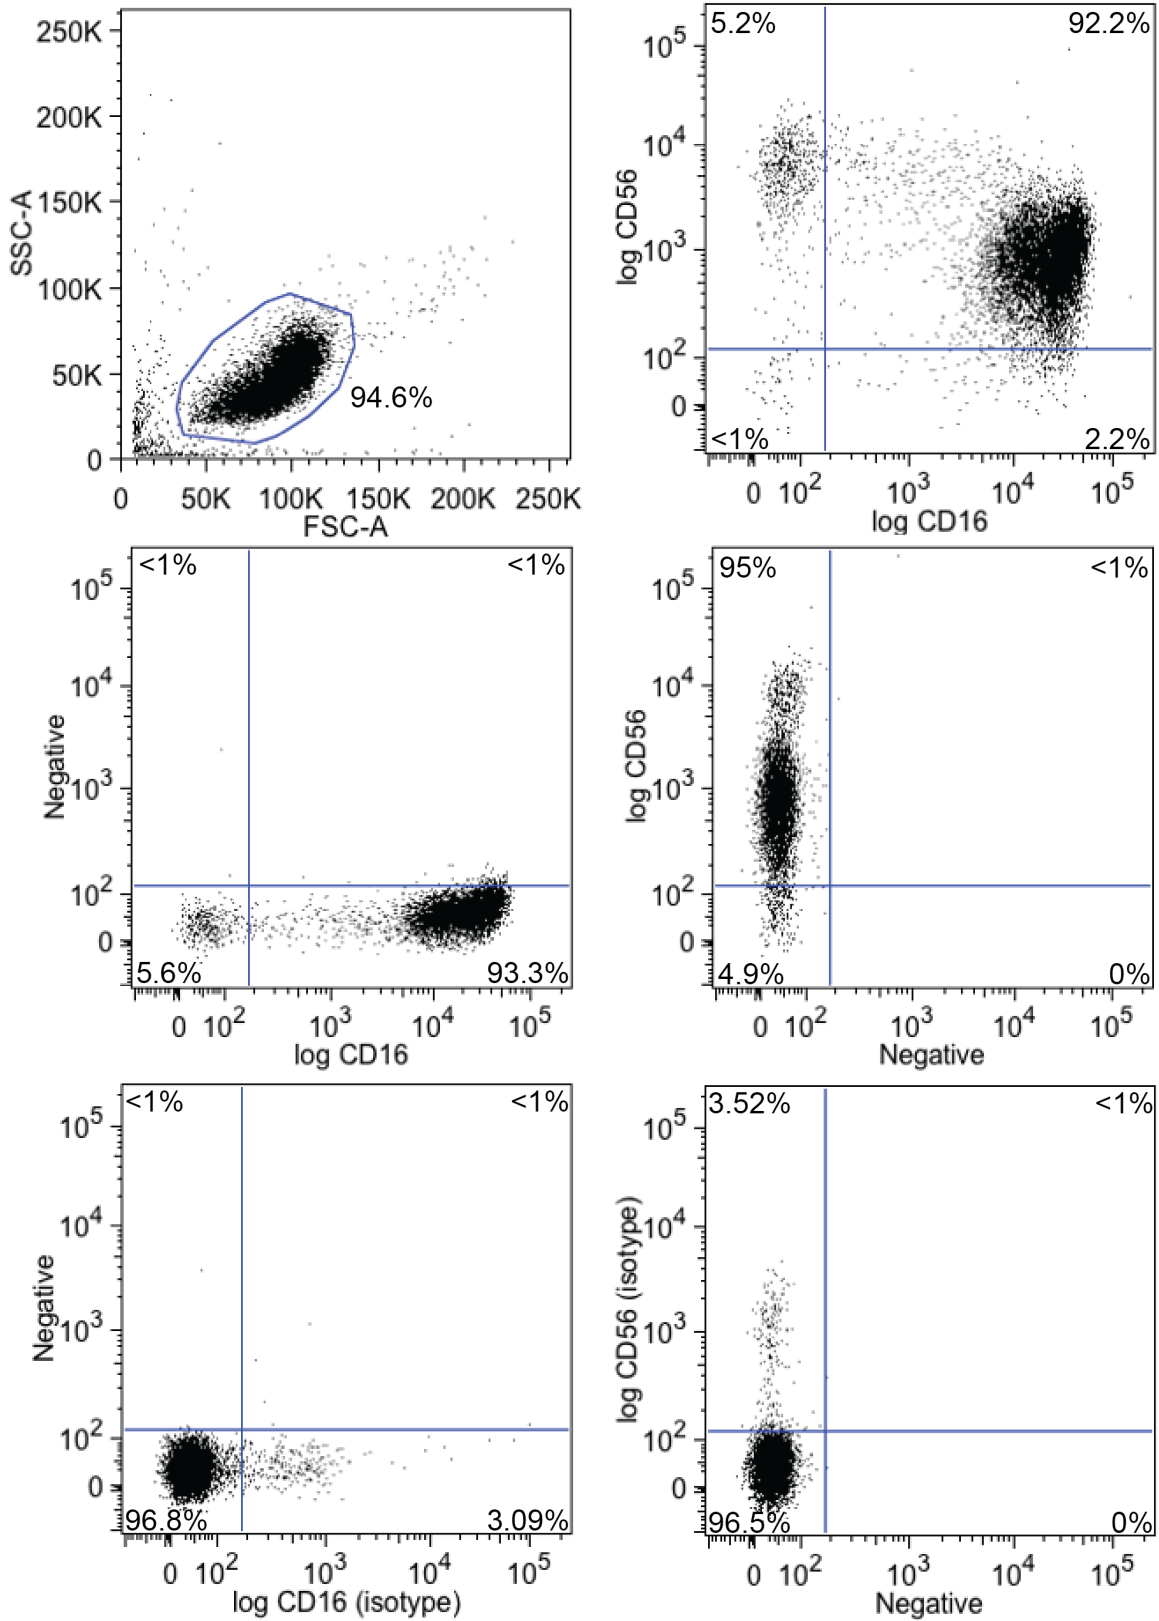

**Figure S1.** Flow cytometry and controls for NK cells isolated with negative selection.

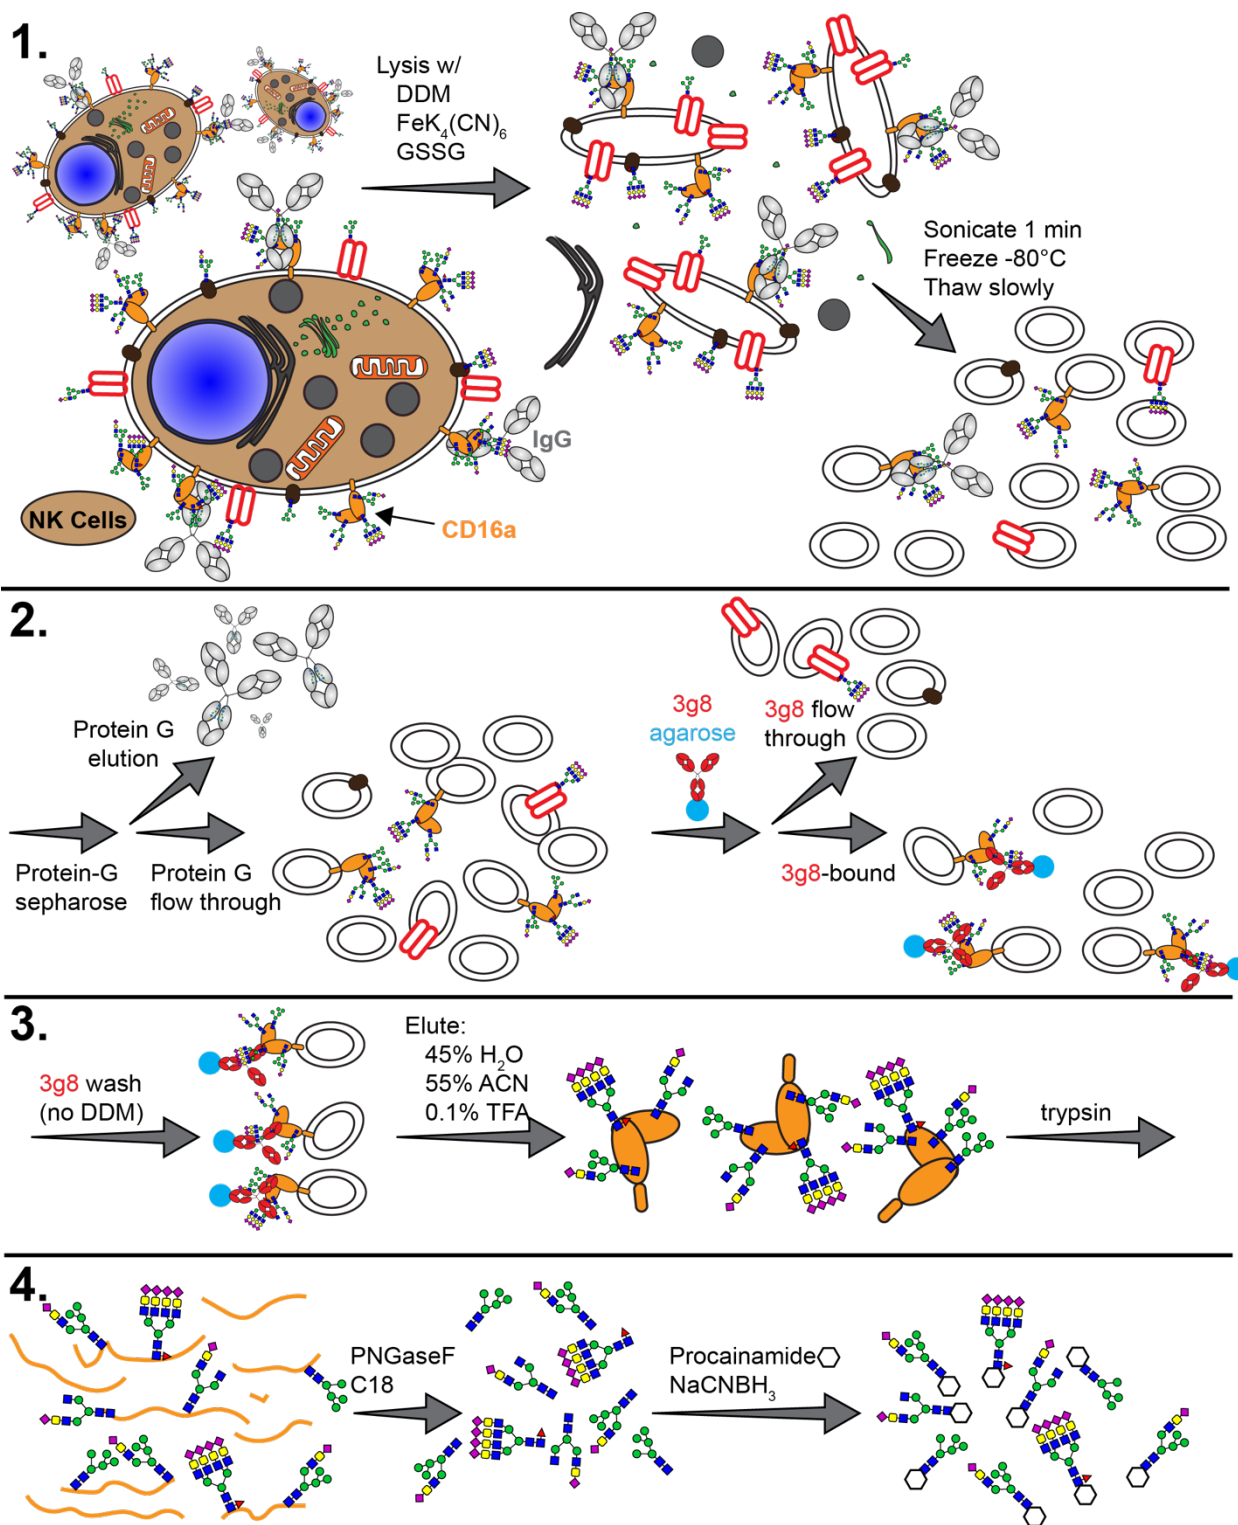

**Figure S2.** CD16a purification and N-glycan analysis scheme.

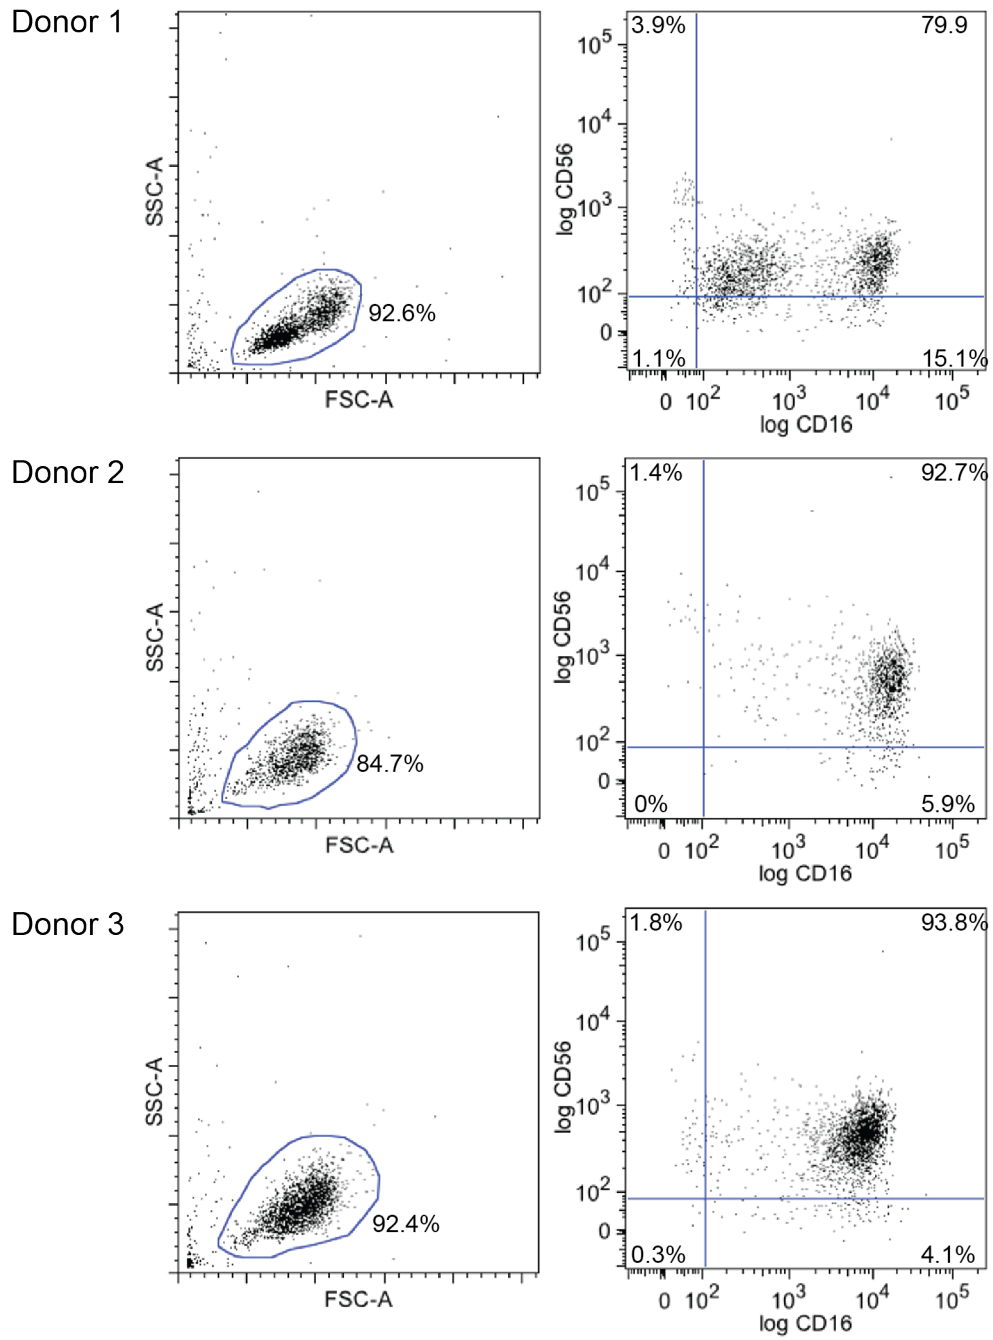

**Figure S3.** Flow cytometry for NK cells from three donors isolated by negative selection.

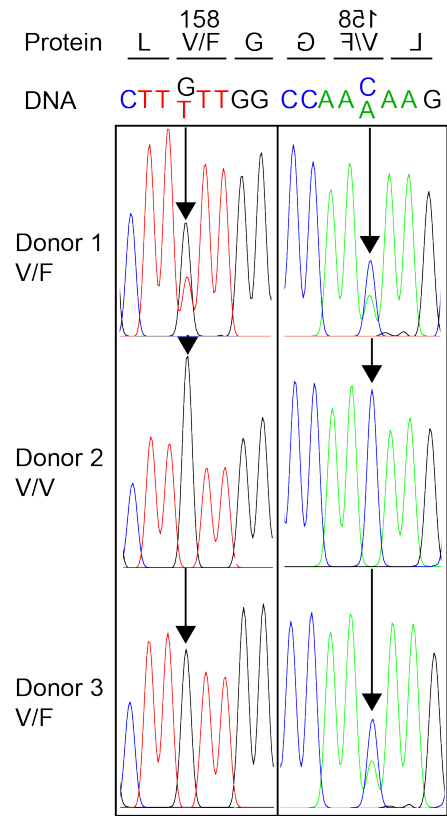

**Figure S4.** DNA sequencing of CD16a cDNA reveals the genotype of each donor.

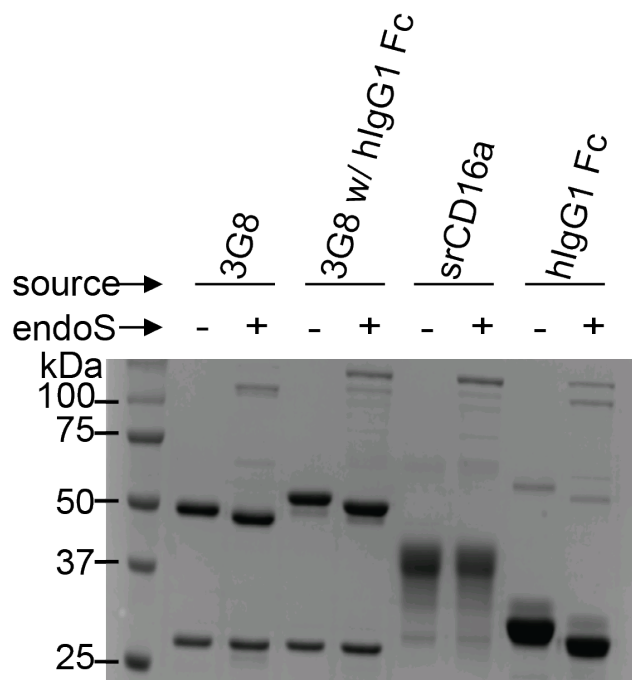

**Figure S5.** Treating 3G8 with EndoS removes N-glycans that could potentially contaminate the N-glycan analysis.

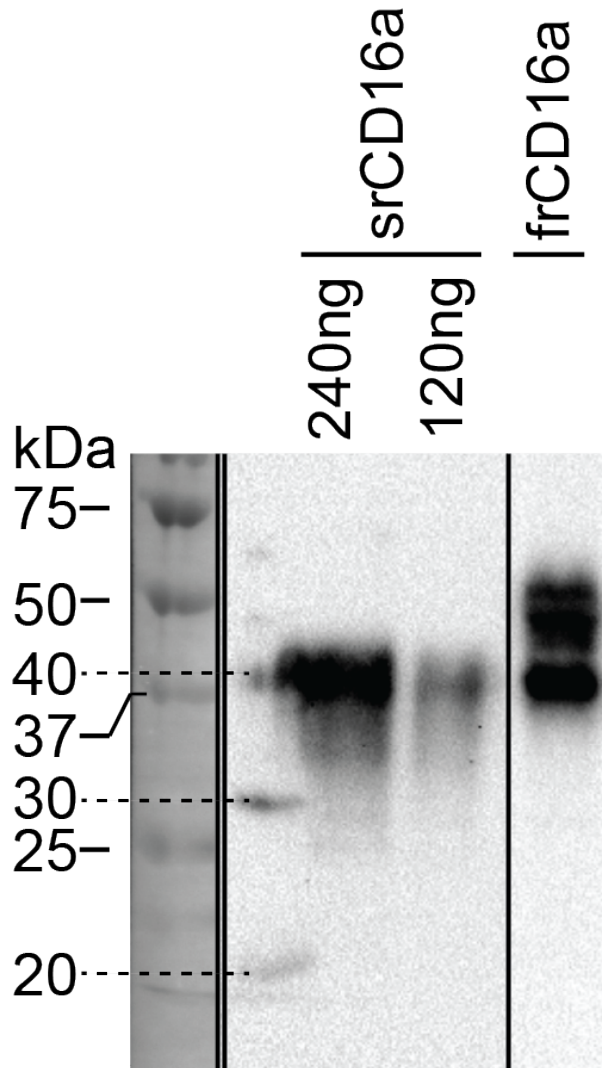

**Figure S6.** Western blot of soluble recombinant CD16a and full-length recombinant CD16a. All of these images are prepared from one membrane. The ladder on the left is a bright-field image of the membrane showing the transferred SDS-PAGE ladder and is separated from the western blot by a solid double vertical line. The molecular mass of each band is denoted with a solid horizontal line. The right image of the western blot shows a ladder in the left-most lane with molecular mass indicated with dashed horizontal lines. The single solid vertical line indicates a splice between the lanes of the western blot, however, contrast was not altered from the original image.

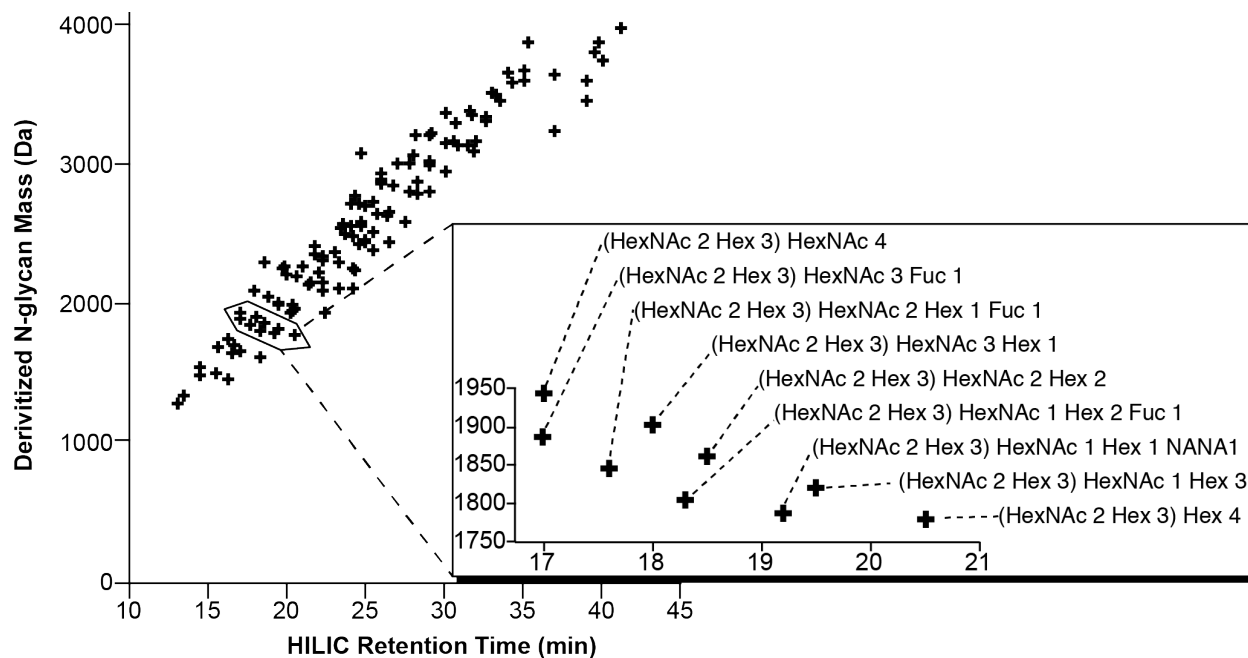

**Figure S7. Separation of the recombinant CD16a extracellular domain-only procainamide-derivatized N-glycans as marked by peak elution times from HILIC.** The inset shows the identification of N-glycans that form the fine features in this plot. Each N-glycan contains nine residues (with a single exception of the NANA-containing N-glycan that has eight) and shows the more hydrophilic N-glycans elute almost five minutes later.
